# Supplementary material for: Meta-analyses of ataluren randomized controlled trials in nonsense mutation Duchenne muscular dystrophy
Source: Atypon-hosted journal article supplement (doi:10.2217/cer-2020-0095), 2020-08-27
Supplement: suppl_file.docx [file suppl_file.docx]

**SUPPLEMENTARY MATERIAL**

**Supplementary Table 1.** Co-investigators from Study PTC124-GD-007-DMD.

| **Name** | **Location** | **Role** | **Contribution** |
| --- | --- | --- | --- |
| Susan D. Apkon, MD | Children's Hospital Colorado, Aurora, Colorado, USA | Site Investigator | Enrolled patients in Study PTC124-GD-007-DMD |
| Richard J. Barohn, MD | University of Kansas Medical Center, Kansas City, Kansas, USA | Site Investigator | Enrolled patients in Study PTC124-GD-007-DMD |
| Enrico Bertini, MD | Medicina Moleculare di Malattie Neuromuscolari e Neurodegenerative Dipartimento dei Laboratori Ospedale Pediatrico Bambino Gesù di Roma, Rome, Italy | Site Investigator | Enrolled patients in Study PTC124-GD-007-DMD |
| Stephanie Burns-Wechsler, MD | Duke Clinical Research Unit Rankin Ward, Durham, North Carolina, USA | Site Investigator | Enrolled patients in Study PTC124-GD-007-DMD |
| Katherine M.D. Bushby, MD | Clinical Research Centre 4th Floor Leazes Wing, Newcastle-upon-Tyne, UK | Site Investigator | Enrolled patients in Study PTC124-GD-007-DMD |
| Craig Campbell, MD | Department of Pediatrics, Children’s Hospital Ontario, University of Western Ontario, London, Ontario, Canada | Site Investigator | Enrolled patients in Study PTC124-GD-007-DMD |
| Brigitte Chabrol, MD | Neurologie Pediatrique, Unité de Médecine Infantile Hôpital d’Enfants, Marseille, France | Site Investigator | Enrolled patients in Study PTC124-GD-007-DMD |
| Emma Ciafaloni, MD | University of Rochester Medical Center, Department of Neurology, Rochester, New York, USA | Site Investigator | Enrolled patients in Study PTC124-GD-007-DMD |
| Jaume Colomer, PhD | Departamento de Neuropediatria, Hospital Sant Joan de Deu, Barcelona, Spain | Site Investigator | Enrolled patients in Study PTC124-GD-007-DMD |
| Giacomo Pietro Comi, MD | Unita Operativa di Neurologia Fondazinone IRCCS, Ospedale Maggiore Policlinico, Milan, Italy | Site Investigator | Enrolled patients in Study PTC124-GD-007-DMD |
| Anne Connolly, MD | Washington University, St. Louis, Missouri, USA | Site Investigator | Enrolled patients in Study PTC124-GD-007-DMD |
| Basil T. Darras, MD | Boston Children's Hospital, Harvard Medical School, Boston, Massachusetts, USA | Site Investigator | Enrolled patients in Study PTC124-GD-007-DMD |
| John W. Day, MD | University of Minnesota Clinical and Translational Science Institute, Minneapolis, Minnesota, USA | Site Investigator | Enrolled patients in Study PTC124-GD-007-DMD |
| Richard S. Finkel, MD | Children's Hospital of Philadelphia, Philadelphia, Pennsylvania, USA | Site Investigator | Enrolled patients in Study PTC124-GD-007-DMD |
| Kevin M. Flanigan, MD | University of Utah Medical Center, Salt Lake City, Utah, USA | Site Investigator | Enrolled patients in Study PTC124-GD-007-DMD |
| Nathalie Goemans, MD | University Hospital Leuven, KU Leuven, Leuven, Belgium | Site Investigator | Enrolled patients in Study PTC124-GD-007-DMD |
| Susan T. Iannaccone, MD | University of Texas Southwestern Medical Center, Children's Medical Center, Dallas, Texas, USA | Site Investigator | Enrolled patients in Study PTC124-GD-007-DMD |
| Kristi J. Jones, MD | Kids Neuroscience, The Children’s Hospital at Westmead, Westmead, New South Wales, Australia | Site Investigator | Enrolled patients in Study PTC124-GD-007-DMD |
| Petra Kaufmann, MD | Columbia University Pediatric Neuromuscular Center, New York, New York, USA | Site Investigator | Enrolled patients in Study PTC124-GD-007-DMD |
| Janbernd Kirschner, MD | Department of Neuropediatrics and Muscle Disorders, Medical Center – University of Freiburg, Freiburg, Germany | Site Investigator | Enrolled patients in Study PTC124-GD-007-DMD |
| Jean K. Mah, MD | Alberta Children's Hospital, NW Calgary, Alberta, Alberta, Canada | Site Investigator | Enrolled patients in Study PTC124-GD-007-DMD |
| Katherine D. Mathews, MD | Institute for Clinical and Translational Science, General Hospital, Iowa City, Iowa, USA | Site Investigator | Enrolled patients in Study PTC124-GD-007-DMD |
| Craig M. McDonald, MD | Department of Physical Medicine & Rehabilitation, The University of California, Davis Medical Center, Sacramento, California, USA | Site Investigator | Enrolled patients in Study PTC124-GD-007-DMD |
| Eugenio Mercuri, MD | Dipartimento di Sciencze Pediatriche Medico-Chiurgiche e Neuroscienze dello Svilippo U.O. Complessa di Neurospichiatria Infantile Policlinica Universitario A. Gemelli, Rome, Italy | Site Investigator | Enrolled patients in Study PTC124-GD-007-DMD |
| Francesco Muntoni, MD | University College London Great Ormond Street Institute of Child Health, London, UK | Site Investigator | Enrolled patients in Study PTC124-GD-007-DMD |
| Yoram Nevo, MD | Schneider Children's Medical Center, Tel Aviv University, Tel Aviv, Israel | Site Investigator | Enrolled patients in Study PTC124-GD-007-DMD |
| Julie Parsons, MD | Children's Hospital Colorado, Aurora, Colorado, USA | Site Investigator | Enrolled patients in Study PTC124-GD-007-DMD |
| Yann Péréon, MD, PhD | Reference Centre for Neuromuscular Disorders AOC, Hôtel-Dieu, Nantes, France | Site Investigator | Enrolled patients in Study PTC124-GD-007-DMD |
| Rosaline C.M. Quinlivan, MD | Robert Jones & Agnes Hunt Orthopaedic Hospital NHS Trust, Children’s Unit, Gobowen Oswestry, UK | Site Investigator | Enrolled patients in Study PTC124-GD-007-DMD |
| J. Ben Renfroe, MD | Northwest Florida Clinical Research Group, Gulf Breeze, Florida, USA | Site Investigator | Enrolled patients in Study PTC124-GD-007-DMD |
| Barry S. Russman, MD | Shriners Hospitals for Children, Portland, Oregon, USA | Site Investigator | Enrolled patients in Study PTC124-GD-007-DMD |
| Monique M. Ryan, MD | The Royal Children's Hospital, Parkville, Victoria, Australia | Site Investigator | Enrolled patients in Study PTC124-GD-007-DMD |
| Jacinda B. Sampson, MD PhD | University of Utah Medical Center, Salt Lake City, Utah, USA | Site Investigator | Enrolled patients in Study PTC124-GD-007-DMD |
| Ulrike Schara, MD | Department of Pediatric Neurology, University of Essen, Essen, Germany | Site Investigator | Enrolled patients in Study PTC124-GD-007-DMD |
| Thomas Sejersen, MD | Department of Neuropediatrics, Karolinska University Hospital, Stockholm, Sweden | Site Investigator | Enrolled patients in Study PTC124-GD-007-DMD |
| Kathryn Selby, MD | Children’s & Women’s Health Centre of British Columbia & University of British Columbia, Vancouver, British Columbia, Canada | Site Investigator | Enrolled patients in Study PTC124-GD-007-DMD |
| Douglas M. Sproule, MD | Columbia University Pediatric Neuromuscular Center, New York, New York, USA | Site Investigator | Enrolled patients in Study PTC124-GD-007-DMD |
| Már Tulinius, MD | Department of Pediatrics, Queen Silvia Children’s Hospital, University of Gothenburg, Gothenburg, Sweden | Site Investigator | Enrolled patients in Study PTC124-GD-007-DMD |
| Thomas Voit, MD | Institiut de Myologie, Groupe Hospitalier Pitie-Salpetriere, Paris, France | Site Investigator | Enrolled patients in Study PTC124-GD-007-DMD |
| Juan J. Vílchez, MD | Departamento de Neurologia, Hospital Universitario La Fe, Valencia, Spain | Site Investigator | Enrolled patients in Study PTC124-GD-007-DMD |
| Brenda L. Wong, MD | Cincinnati Children's Hospital Medical Center, Cincinnati, Ohio, USA | Site Investigator | Enrolled patients in Study PTC124-GD-007-DMD |

**Supplementary Table 2.** Co-investigators from the ACT DMD Study Group (Study PT124-GP-020-DMD).

| **Name** | **Location** | **Role** | **Contribution** |
| --- | --- | --- | --- |
| Hoda Z. Abdel‐Hamid, MD | Children's Hospital of Pittsburgh of UPMC, Pittsburgh, Pennsylvania, USA | Site Investigator | Enrolled patients in ACT DMD (Study PT124-GP-020-DMD) |
| Susan D. Apkon, MD | Seattle Children's Hospital, Seattle, Washington, USA | Site Investigator | Enrolled patients in ACT DMD (Study PT124-GP-020-DMD) |
| Richard J. Barohn, MD | University of Kansas Medical Center, Kansas City, Kansas, USA | Site Investigator | Enrolled patients in ACT DMD (Study PT124-GP-020-DMD) |
| Enrico Bertini, MD | Bambino Gesù Children's Research Hospital, Rome, Italy | Site Investigator | Enrolled patients in ACT DMD (Study PT124-GP-020-DMD) |
| Clemens Bloetzer, MD; replaced by Pierre-Yves Jeannet, MD | Unité de Neurologie et Neuroréhabilitation Pédiatrique, Département de Pédiatrie, CHUV, Lausanne Canton de Vaud, Switzerland | Site Investigator | Enrolled patients in ACT DMD (Study PT124-GP-020-DMD) |
| Russell J. Butterfield, MD | University of Utah, Department of Neurology and Pediatrics, Salt Lake City, Utah, USA | Site Investigator | Enrolled patients in ACT DMD (Study PT124-GP-020-DMD) |
| Craig Campbell, MD | Schulich School of Medicine and Dentistry, Western University, Children's Health Research Institute, London, Ontario, Canada | Site Investigator | Enrolled patients in ACT DMD (Study PT124-GP-020-DMD) |
| Brigitte Chabrol, MD | Hôpital de la Timone, Unité de Médecine Infantile, Marseille, France | Site Investigator | Enrolled patients in ACT DMD (Study PT124-GP-020-DMD) |
| Jong‐Hee Chae, MD | Seoul National University Children's Hospital, 101 Daehak‐ro Jongno‐gu, Seoul, South Korea | Site Investigator | Enrolled patients in ACT DMD (Study PT124-GP-020-DMD) |
| Giacomo Pietro Comi, MD | IRCCS Foundation Ca'Granda, Ospedale Maggiore Policlinico, Dino Ferrari Centre, Department of Pathophysiology and Transplantation, University of Milan, Milan, Italy | Site Investigator | Enrolled patients in ACT DMD (Study PT124-GP-020-DMD) |
| Anne Connolly, MD | Washington University,  St. Louis, Missouri, USA | Site Investigator | Enrolled patients in ACT DMD (Study PT124-GP-020-DMD) |
| Basil T. Darras, MD | Boston Children's Hospital, Harvard Medical School, Boston, Massachusetts, USA | Site Investigator | Enrolled patients in ACT DMD (Study PT124-GP-020-DMD) |
| Isabelle Desguerre, MD | Necker‐Enfants Malades, Bâtiment Robert Debré, Paris, France | Site Investigator | Enrolled patients in ACT DMD (Study PT124-GP-020-DMD) |
| Raul G. Escobar, MD | Neurology Unit, Division of Pediatrics, Medical School, Pontificia Universidad Catolica de Chile, Santiago, Chile | Site Investigator | Enrolled patients in ACT DMD (Study PT124-GP-020-DMD) |
| Erika Finanger, MD | Oregon Health and Science University, Portland, Oregon, USA | Site Investigator | Enrolled patients in ACT DMD (Study PT124-GP-020-DMD) |
| Kevin M. Flanigan, MD | Nationwide Children's Hospital, Columbus, Ohio, USA | Site Investigator | Enrolled patients in ACT DMD (Study PT124-GP-020-DMD) |
| Nathalie Goemans, MD | University Hospitals Leuven, KU Leuven, Belgium | Site Investigator | Enrolled patients in ACT DMD (Study PT124-GP-020-DMD) |
| Michela Guglieri, MD and Katherine M. D. Bushby, MD | Institute of Genetic Medicine International Centre for Life, Central Parkway, Newcastle‐upon‐Tyne, UK | Site Investigator | Enrolled patients in ACT DMD (Study PT124-GP-020-DMD) |
| Peter Heydemann, MD | Rush University Medical Center, Chicago, Illinois, USA | Site Investigator | Enrolled patients in ACT DMD (Study PT124-GP-020-DMD) |
| Imelda Hughes, MD | Royal Manchester Children's Hospital, Oxford Road, Manchester, UK | Site Investigator | Enrolled patients in ACT DMD (Study PT124-GP-020-DMD) |
| Susan T. Iannaccone, MD | Children’s Medical Center, University of Texas Southwestern Medical Center, Dallas, Texas, USA | Site Investigator | Enrolled patients in ACT DMD |
| Kristi J. Jones, MD | Kids Neuroscience, The Children's Hospital at Westmead, Westmead, New South Wales, Australia | Site Investigator | Enrolled patients in ACT DMD (Study PT124-GP-020-DMD) |
| Anna M. Kaminska, MD | Medical University of Warsaw, Warsaw, Poland | Site Investigator | Enrolled patients in ACT DMD (Study PT124-GP-020-DMD) |
| Peter Karachunski, MD | University of Minnesota, Department of Neurology, Minneapolis, Minnesota, USA | Site Investigator | Enrolled patients in ACT DMD (Study PT124-GP-020-DMD) |
| Janbernd Kirschner, MD | Medical Center ‐ University of Freiburg, University of Freiberg, Freiberg, Germany | Site Investigator | Enrolled patients in ACT DMD (Study PT124-GP-020-DMD) |
| Martin Kudr, MD | Department of Paediatric Neurology, Charles University, 2nd Faculty of Medicine, Motol University Hospital, Prague, Czech Republic | Site Investigator | Enrolled patients in ACT DMD (Study PT124-GP-020-DMD) |
| Timothy Lotze, MD | Texas Children's Hospital, Houston, Texas, USA | Site Investigator | Enrolled patients in ACT DMD (Study PT124-GP-020-DMD) |
| Jean K. Mah, MD | Alberta Children's Hospital, University of Calgary, Calgary, Alberta, Canada | Site Investigator | Enrolled patients in ACT DMD (Study PT124-GP-020-DMD) |
| Katherine Mathews, MD | Department of Pediatrics, Division of Pediatric Neurology, University of Iowa Children's Hospital, Iowa City, Iowa, USA | Site Investigator | Enrolled patients in ACT DMD (Study PT124-GP-020-DMD) |
| Craig M. McDonald, MD | University of California at Davis Medical Center, Sacramento, California, USA | Site Investigator | Enrolled patients in ACT DMD (Study PT124-GP-020-DMD) |
| Eugenio Mercuri, MD | Department of Pediatric Neurology, Catholic University, Rome, Italy | Site Investigator | Enrolled patients in ACT DMD (Study PT124-GP-020-DMD) |
| Francesco Muntoni, MD | University College London Great Ormond Street Institute of Child Health, London, UK | Site Investigator | Enrolled patients in ACT DMD (Study PT124-GP-020-DMD) |
| Yoram Nevo, MD and Tayla Dor-Wollman, MD | Hadassah Medical Center, Mount Scopus, Jerusalem, Israel | Site Investigator | Enrolled patients in ACT DMD (Study PT124-GP-020-DMD) |
| Andrés Nascimento Osorio, MD | Hospital Sant Joan de Déu, Universidad de Barcelona, CIBER, ISCIII, Barcelona, Spain | Site Investigator | Enrolled patients in ACT DMD (Study PT124-GP-020-DMD) |
| Julie Parsons, MD | Children's Hospital Colorado, University of Colorado School of Medicine, Aurora, Colorado, USA | Site Investigator | Enrolled patients in ACT DMD (Study PT124-GP-020-DMD) |
| Yann Péréon, MD, PhD | Reference Centre for Neuromuscular Disorders AOC, Hôtel-Dieu, Nantes, France | Site Investigator | Enrolled patients in ACT DMD (Study PT124-GP-020-DMD) |
| Alexandra Prufer de Queiroz Campos Araujo, MD | Rua Bruno Lobo, 50‐3º andar–Departamento de Pediatria, Cidade Universitária–Ilha do Fundão, Rio de Janeiro, Brazil | Site Investigator | Enrolled patients in ACT DMD (Study PT124-GP-020-DMD) |
| J. Ben Renfroe, MD | Child Neurology Center of Northwest Florida, Gulf Breeze, Florida, USA | Site Investigator | Enrolled patients in ACT DMD (Study PT124-GP-020-DMD) |
| Maria Bernadete Dutra de Resende, MD | Departamento de Neurologia Infantil, Hospital das Clínicas da Faculdade de Medicina da Universidade de São Paulo, São Paulo, Brazil | Site Investigator | Enrolled patients in ACT DMD (Study PT124-GP-020-DMD) |
| Monique M. Ryan, MD | The Royal Children's Hospital, Parkville, Victoria, Australia | Site Investigator | Enrolled patients in ACT DMD (Study PT124-GP-020-DMD) |
| Jacinda B. Sampson, MD, PhD, replaced by Jahannaz Dastgir, MD | Columbia University Medical Center, New York, New York, USA | Site Investigator | Enrolled patients in ACT DMD (Study PT124-GP-020-DMD) |
| Ulrike Schara, MD | Department of Pediatric Neurology, University Hospital Essen, University of Duisburg‐Essen, Essen, Germany | Site Investigator | Enrolled patients in ACT DMD (Study PT124-GP-020-DMD) |
| Kathryn Selby, MD | Division of Neurology, British Columbia's Children's Hospital, Vancouver, British Columbia, Canada | Site Investigator | Enrolled patients in ACT DMD (Study PT124-GP-020-DMD) |
| Thomas Sejersen, MD | Karolinska University Hospital, Karolinska Institutet, Stockholm, Sweden | Site Investigator | Enrolled patients in ACT DMD (Study PT124-GP-020-DMD) |
| Perry B. Shieh, MD | University of California, Los Angeles, California, USA | Site Investigator | Enrolled patients in ACT DMD (Study PT124-GP-020-DMD) |
| Gihan Tennekoon, MD | The Children's Hospital of Philadelphia, Division of Neurology, Philadelphia, Pennsylvania, USA | Site Investigator | Enrolled patients in ACT DMD (Study PT124-GP-020-DMD) |
| Haluk Topaloglu, MD | Hacettepe Children's Hospital, Ankara, Turkey | Site Investigator | Enrolled patients in ACT DMD (Study PT124-GP-020-DMD) |
| Ricardo Erazo Torricelli, MD | Hospital Luis Calvo Mackenna, Santiago de Chile, Chile | Site Investigator | Enrolled patients in ACT DMD (Study PT124-GP-020-DMD) |
| Már Tulinius, MD | Gothenburg University, Queen Silvia Children's Hospital, Gothenburg, Sweden | Site Investigator | Enrolled patients in ACT DMD (Study PT124-GP-020-DMD) |
| Juan J. Vílchez, MD | Hospital Universitario y Politécnico La Fe, CIBERER, Valencia, Spain | Site Investigator | Enrolled patients in ACT DMD (Study PT124-GP-020-DMD) |
| Giuseppe Vita, MD | University of Messina, AOU Policlinico G Martino, Nemo Sud Clinical Centre, Messina, Italy | Site Investigator | Enrolled patients in ACT DMD (Study PT124-GP-020-DMD) |
| Thomas Voit, MD | Centre Hospitalier Pitié-Salpétriére Institut de Myologie, Paris, France | Site Investigator | Enrolled patients in ACT DMD (Study PT124-GP-020-DMD) |
| Petr Vondráček, MD | Fakultni nemocnice Brno Jihlavská 20, Brno, Czech Republic | Site Investigator | Enrolled patients in ACT DMD (Study PT124-GP-020-DMD) |
| Brenda Wong, MD | Cincinnati Children's Hospital Medical Center, Cincinnati, Ohio, USA | Site Investigator | Enrolled patients in ACT DMD (Study PT124-GP-020-DMD) |

**Supplementary Table 3.** The Clinical Evaluator Training Group for Study PTC124-GD-007-DMD.

| **Name** | **Location** | **Role** | **Contribution** |
| --- | --- | --- | --- |
| R. Ted Abresch, MS | University of California Davis, School of Medicine, Sacramento, California, USA | Clinical Evaluator Training Group (PTC124-GD-007-DMD) | Responsible for the development of standardized procedures for the 6MWT, TFTs, myometry, and StepWatch® Activity Monitor calibration; development of the Clinical Evaluator manual; and overseeing training of site Clinical Evaluators. |
| Kim Coleman, MS | OrthoCare Innovations, Mountlake Terrace, Washington, USA | Clinical Evaluator Training Group (PTC124-GD-007-DMD) | Responsible for the development of standardized procedures for the 6MWT, TFTs, myometry, and StepWatch® Activity Monitor calibration; development of the Clinical Evaluator manual; and overseeing training of site Clinical Evaluators. |
| Michelle Eagle, PhD, MSc, MCSP | Atom International,  Gateshead, UK | Clinical Evaluator Training Group (PTC124-GD-007-DMD) | Responsible for the development of standardized procedures for the 6MWT, TFTs, myometry, and StepWatch® Activity Monitor calibration; development of the Clinical Evaluator manual; and overseeing training of site Clinical Evaluators. |
| Eduard Gappmaier, PT, PhD | University of Utah Hospital, General Clinical Research Center, Salt Lake City, Utah, USA | Clinical Evaluator Training Group (PTC124-GD-007-DMD) | Responsible for the development of standardized procedures for the 6MWT, TFTs, myometry, and StepWatch® Activity Monitor calibration; development of the Clinical Evaluator manual; and overseeing training of site Clinical Evaluators. |
| Allan M. Glanzman, PT, DPT, PCS, ATP | The Children’s Hospital of Philadelphia, Philadelphia, Pennsylvania, USA | Clinical Evaluator Training Group (PTC124-GD-007-DMD) | Responsible for the development of standardized procedures for the 6MWT, TFTs, myometry, and StepWatch® Activity Monitor calibration; development of the Clinical Evaluator manual; and overseeing training of site Clinical Evaluators. |
| Julaine Florence, PT, DPT | Washington University School of Medicine, St. Louis, Missouri, USA | Clinical Evaluator Training Group (PTC124-GD-007-DMD) | Responsible for the development of standardized procedures for the 6MWT, TFTs, myometry, and StepWatch® Activity Monitor calibration; development of the Clinical Evaluator manual; and overseeing training of site Clinical Evaluators. |
| Erik Henricson, MPH | University of California Davis, School of Medicine, Sacramento, California, USA | Clinical Evaluator Training Group (PTC124-GD-007-DMD) | Responsible for the development of standardized procedures for the 6MWT, TFTs, myometry, and StepWatch® Activity Monitor calibration; development of the Clinical Evaluator manual; and overseeing training of site Clinical Evaluators. |

6MWT, 6-minute walk test; NSAA, North Star Ambulatory Assessment; TFT, timed-function test.**Supplementary Table 4.** The Clinical Evaluator Training Group forACT DMD (Study PT124-GP-020-DMD).

| **Name** | **Location** | **Role** | **Contribution** |
| --- | --- | --- | --- |
| Lindsay N. Alfano, PT | Center for Gene Therapy, Nationwide Children’s  Hospital, Columbus, Ohio, USA. | Clinical Evaluator Training Group (ACT DMD) | Responsible for the development of standardized procedures for the 6MWT, TFTs, and the NSAA; development of the Clinical Evaluator manual; and overseeing training of Clinical Evaluators. |
| Michelle Eagle, PhD, MSc, MCSP | Atom International,  Gateshead, UK | Clinical Evaluator Training Group (ACT DMD) | Responsible for the development of standardized procedures for the 6MWT, TFTs, and the NSAA; development of the Clinical Evaluator manual; and overseeing training of Clinical Evaluators. |
| Meredith K. James, PT | The John Walton Muscular  Dystrophy Research Centre, Newcastle, UK | Clinical Evaluator Training Group (ACT DMD) | Responsible for the development of standardized procedures for the 6MWT, TFTs, and the NSAA; development of the Clinical Evaluator manual; and overseeing training of Clinical Evaluators. |
| Linda P. Lowes, PT, PhD | Center for  Gene Therapy, Nationwide Children’s Hospital, Columbus, Ohio, USA | Clinical Evaluator Training Group (ACT DMD) | Responsible for the development of standardized procedures for the 6MWT, TFTs, and the NSAA; development of the Clinical Evaluator manual; and overseeing training of Clinical Evaluators. |
| Anna Mayhew, PhD | MRC Centre for Neuromuscular Diseases, Newcastle  University, Newcastle, UK | Clinical Evaluator Training Group (ACT DMD) | Responsible for the development of standardized procedures for the 6MWT, TFTs, and the NSAA; development of the Clinical Evaluator manual; and overseeing training of Clinical Evaluators. |
| Elena S. Mazzone, PT | Department of Pediatric  Neurology, Catholic University, Rome, Italy | Clinical Evaluator Training Group (ACT DMD) | Responsible for the development of standardized procedures for the 6MWT, TFTs, and the NSAA; development of the Clinical Evaluator manual; and overseeing training of Clinical Evaluators. |
| Leslie Nelson, PT, MPT | University of Texas, Southwestern Medical Center, Texas, USA | Clinical Evaluator Training Group (ACT DMD) | Responsible for the development of standardized procedures for the 6MWT, TFTs, and the NSAA; development of the Clinical Evaluator manual; and overseeing training of Clinical Evaluators. |
| Kristy. J. Rose, PT, PhD | Gait Analysis Laboratory of New South Wales, The Children’s Hospital at Westmead, Sydney, NSW, Australia | Clinical Evaluator Training Group (ACT DMD) | Responsible for the development of standardized procedures for the 6MWT, TFTs, and the NSAA; development of the Clinical Evaluator manual; and overseeing training of Clinical Evaluators. |

6MWT, 6-minute walk test; NSAA, North Star Ambulatory Assessment; TFT, timed-function test.

**Supplementary Table 5.** Search strategy for Ovid MEDLINE® (1946 to present) and Embase (1974 to February 8, 2019).

| 1 | ataluren.tw |
| --- | --- |
| 2 | Translarna.tw |
| 3 | 1 or 2 |
| 4 | Duchenne muscular dystrophy.tw |
| 5 | DMD.tw |
| 6 | Duchenne.tw |
| 7 | nonsense mutation Duchenne muscular dystrophy.tw |
| 8 | nmDMD.tw |
| 9 | dystrophinopathy.tw |
| 10 | 4 or 5 or 6 or 7 or 8 or 9 |
| 11 | 3 and 10 |
| 12 | Limit 11 to English language |
| 13 | Limit 12 to human |
| 14 | Remove duplicates from 13 |

Search conducted: February 11, 2019.
